Bichet et al. 2020

1 **Bacteriophage uptake by Eukaryotic cell layers represents a major sink for**  
2 **phages during therapy**

3

4 **Authors**

5 Marion C. Bichet<sup>1</sup>, Wai Hoe Chin<sup>1</sup>, William Richards<sup>1</sup>, Yu-Wei Lin<sup>2</sup>, Laura Avellaneda-  
6 Franco<sup>1</sup>, Catherine A. Hernandez<sup>3</sup>, Arianna Oddo<sup>4</sup>, Oleksandr Chernyavskiy<sup>5</sup>, Volker  
7 Hilsenstein<sup>5</sup>, Adrian Neild<sup>6</sup>, Jian Li<sup>2</sup>, Nicolas Hans Voelcker<sup>4</sup>, Ruzeen Patwa<sup>1</sup> & Jeremy J.  
8 Barr<sup>1\*</sup>

9 <sup>1</sup> School of Biological Sciences, Monash University, Clayton Campus, VIC, 3800, Australia

10 <sup>2</sup> Biomedicine Discovery Institute and Department of Microbiology, Monash University, Clayton, VIC,  
11 Australia

12 <sup>3</sup> Department of Integrative Biology, University of California, Berkeley, Berkeley, CA, USA

13 <sup>4</sup> Faculty of Pharmacy and Pharmaceutical Sciences, Monash University, Parkville Campus, VIC, 3800,  
14 Australia

15 <sup>5</sup> Monash Micro Imaging, Monash University, Clayton Campus, VIC, 3800, Australia

16 <sup>6</sup> Department of Mechanical and Aerospace Engineering, Monash University, Clayton Campus, VIC,  
17 3800, Australia

18

19 **\*Corresponding author**

20 Jeremy J. Barr

21 25 Rainforest Walk, School of Biological Sciences, Monash University, Clayton Campus, VIC,  
22 3800, Australia

23 [jeremy.barr@monash.edu](mailto:jeremy.barr@monash.edu)

Bichet et al. 2020

24 **Abstract**

25           For over 100 years, bacteriophages have been known as viruses that infect bacteria. Yet  
26 it is becoming increasingly apparent that bacteriophages, or phages for short, have tropisms  
27 outside their bacterial hosts. During phage therapy, high doses of phages are directly  
28 administered and disseminated throughout the body, facilitating broad interactions with  
29 eukaryotic cells. Using live cell imaging across a range of cell lines we demonstrate that cell  
30 type plays a major role in phage internalisation and that smaller phages (< 100 nm) are  
31 internalised at higher rates. Uptake rates were validated under physiological shear stress  
32 conditions using a microfluidic device that mimics the shear stress to which endothelial cells  
33 are exposed to in the human body. Phages were found to rapidly adhere to eukaryotic cell  
34 layers, with adherent phages being subsequently internalised by macropinocytosis and  
35 functional phages accumulating and stably persisting intracellularly. Finally, we incorporate  
36 these results into an established pharmacokinetic model demonstrating the potential impact of  
37 phage accumulation by these cell layers, which represents a major sink for circulating phages  
38 in the body. Understanding these interactions will have important implications on innate  
39 immune responses, phage pharmacokinetics, and the efficacy of phage therapy.

40

## 41 **Introduction**

42 Phages, short for bacteriophages, are viruses that infect bacteria and are the most abundant life  
43 form on the planet (1–3). Phages are found ubiquitously in the environment and are a major  
44 contributor to global genetic diversity (4–6). Our bodies harbour a large number of phages,  
45 and, together with their bacterial hosts, they constitute a key component of our gut microbiome  
46 (7). The gut carries the largest aggregation of phages in the body, with an estimated  $2 \times 10^{12}$   
47 phages present in the average human colon (4,8,9). These phages are constantly interacting  
48 with gut bacteria, as well as the epithelial cell layers of the gut (10). Phages are detected in the  
49 circulatory systems of the body, suggesting they are capable of translocating from the gut and  
50 penetrating throughout the body (8,11). Once past the gut barrier phages are able to penetrate  
51 cell layers and major organs of the body; being found in classically sterile regions such as the  
52 blood, serum, organs and even the brain (8,10–19). Numerous mechanisms pertaining to the  
53 transport of phages across epithelial barriers have been proposed (11,16), including the ‘leaky  
54 gut’ where phages bypass cell barriers at sites of damage and inflammation (20,21), and  
55 receptor-mediated endocytosis (22,23). Recently, a non-specific mechanism for phage uptake  
56 and transport across epithelial cell layers was proposed by Nguyen and colleagues, whereby  
57 epithelial cells uptake phages via macropinocytosis and preferentially transcytose phages from  
58 the apical surface toward the basolateral side of the cell (8,24). Macropinocytosis is a broad  
59 mechanism describing the enclosure of media within ruffles in cells’ membrane, prior to  
60 internalising the media, and any phages it may contain, within the cells. Despite their  
61 prevalence in the human body, phage’s capacity to interact with and influence eukaryotic cells  
62 remains largely unknown. These interactions can have important implications during phage  
63 therapy.

64

65 Phage therapy is a promising alternative to treat pathogenic bacterial infections. In Eastern  
66 Europe, phage therapy was widely used since its discovery in 1917 (1), whereas in Western  
67 countries, phage therapy was largely abandoned in favour of antibiotics (25–28). However,  
68 with the rise of antimicrobial resistance as one of the greatest threats to human health, phage  
69 therapy is being re-established as a potential treatment option for difficult-to-treat, antibiotic  
70 resistant, bacterial infections (25). In order for phage therapy to be effective, phages must first  
71 be administered to the site of infection. Administration routes include, intravenous (IV) or  
72 intraperitoneal (IP) to treat septicemia; orally to treat gastrointestinal infections; intranasal or  
73 inhalation to treat respiratory infections; or topically for cutaneous infections (29,30). The

Bichet et al. 2020

74 administration route and bioavailability of phages needs to be carefully taken into account in  
75 order to achieve favourable efficacy *in vivo*.

76

77 In contrast to conventional drugs, phages are unique therapeutic agents capable of self-  
78 replicating and maintaining titres in the body (30–33). As such, there is a lack of knowledge  
79 regarding phage pharmacokinetics and pharmacodynamics (31). Following administration, two  
80 major pharmacokinetic factors important for the efficacy of phage therapy are accessibility and  
81 clearance. First, natural barriers such as cell layers and mucus can decrease accessibility of  
82 phages to sites of infection, thereby necessitating the administration of higher doses to achieve  
83 a favourable therapeutic effect. Second, phage clearance has been reported to occur rapidly;  
84 sometimes within just minutes to hours following parenteral administration in animal models  
85 and patients (14,34–40). Phage clearance within the body is thought to be mediated by three  
86 main components: 1) Phagocytic cells (41), 2) The Mononuclear Phagocytic System (MPS;  
87 which was also previously called the reticuloendothelial system, or RES) which includes the  
88 liver and spleen that filter out and remove phages from circulation (42), and 3) Phage  
89 neutralizing antibodies, although it is still unclear how effective and rapidly produced these  
90 anti-phage antibodies are (31,43). Due to these complications, it is difficult to predict how  
91 phages will behave in the body when administered and ultimately whether phage therapy will  
92 be successful.

93

94 One underexplored aspect of phage therapy is the non-specific interactions between phages  
95 and the cell layers of the body. During therapy, large quantities of phage monocultures or  
96 cocktails are administered to patients in order to maintain a killing titre to combat a bacterial  
97 infection. Once within the body, these phages can have very short half-lives and are actively  
98 removed or inactivated by the body (38–40,44). Following administration during phage  
99 therapy, epithelial and endothelial cell layers are amongst the first and most abundant phage-  
100 eukaryote interactions. Here, we present new insights into phage-mammalian cell adherence,  
101 uptake, and trafficking, via *in vitro* tissue culture cell layers. Our results suggest that cell layers  
102 of the human body represent a major and unaccounted sink for exogenously administered  
103 phages. Put within the context of phage therapy, the interaction between eukaryotic cells and  
104 exogenous phages have important implications for phage administration, dosing, and  
105 pharmacokinetics.

106



107 **Results**

108 **The rate of phage uptake varies depending on the cell type.** To better understand phage-  
109 eukaryote interactions, we used seven *in vitro* tissue culture cell lines that were selected to be  
110 broadly representative of different tissues types within the body, and examined their  
111 interactions with ultrapure high titre monocultures of T4 phage. Using real time live-cell  
112 imaging on a confocal microscope with a sensitive hybrid detector (HyD), we visualised the  
113 interaction and subsequent internalisation of phage particles within eukaryotic cells. Cells were  
114 first grown on glass bottom slides for two days to generate an ~ 80% confluent cell layer,  
115 followed by fluorescence staining of the nucleus and plasma membrane. T4 phages were  
116 prepared using the Phage-on-Tap method (45), labelled using SYBR-Gold, subsequently  
117 washed to remove residual stain, and then directly applied to cell layers observed using live  
118 cell imaging.

119  
120 Phages were visualised in real time being engulfed and trafficked through all seven of the  
121 different cell lines over a two-hour period (Fig. 1a and Supplemental movies SM1-7). The cell  
122 types tested include: epithelial cells - HeLa, A549 and HT29, from the cervix, lung and colon,  
123 respectively; fibroblast cells - MDCK-I and BJ, from dog kidney and human skin, respectively;  
124 the endothelial cell line - HUVEC from umbilical vein; and monocyte-induced macrophages -  
125 THP-1 cells (Fig. 1b). The increase in green fluorescence over time corresponds to the uptake  
126 and accumulation of fluorescently labelled T4 phages by the cells. We saw the first evidence  
127 of phage accumulation within cells occurring around 30 minutes, with continued accumulation  
128 over the following 90 minutes.

129  
130 We observed large variation in the uptake of phages across the seven cell types investigated.  
131 To quantify this, cells containing intracellular phages were manually counted and compared  
132 with the total number of cells in the field of view (FOV) at the two-hour time point for each  
133 replicate. Cells were then categorised as either high, intermediate, or low phage-uptake using  
134 univariate clustering analysis (Fig. 1c and Supplemental Fig. 1) (46). A549 lung epithelial cells  
135 showed the highest accumulation of phages, with a median of cells containing fluorescently-  
136 labelled phages at the two-hour time point of 99% ( $\pm 2\%$ , mean  $\pm$  standard deviation [SD];  
137 Field of View [FOV]  $n = 8$ ; coefficient of variation [CV] = 2%). Next, HUVEC, MDCK-1,  
138 and HeLa cells, representing endothelial, fibroblast and epithelial cell types all showed  
139 intermediate levels of phage accumulation at the two hour time point, with medians of 44% ( $\pm$

Bichet et al. 2020

140 34% SD; FOV  $n = 10$ ; CV = 63%), 51% ( $\pm 26\%$  SD; FOV  $n = 4$ ; CV = 54%), and 41% ( $\pm 18\%$   
141 SD; FOV  $n = 7$ ; CV = 42%) of phage-positive cells, respectively. Finally, THP-1, HT29, and  
142 BJ cells, representing macrophages, epithelial and fibroblast all showed little to no  
143 accumulation with medians of 0% ( $\pm 11\%$  SD; FOV  $n = 9$ ; CV = 155%), 0% ( $\pm 0.5\%$  SD; FOV  
144  $n = 4$ ; CV = 200%), and 0% ( $\pm 0\%$  SD; FOV  $n = 4$ ; CV = 0%) phage-positive cells at two  
145 hours, respectively. We further quantified the rate at which cells internalised phages by  
146 manually counting the number of cells per frame of interest containing fluorescently-labelled  
147 phages for each of the field of view per cell lines (Fig. 1d). Most cells showed large variability  
148 in the uptake rate over the two-hour period. For A549 cells, which had the highest accumulation  
149 of phages, we saw large variation in the rate of uptake, with a median of 27% ( $\pm 36\%$  SD; FOV  
150  $n = 6$ ; CV = 83%) of cells that contained phages at one hour of incubation compared to 100%  
151 ( $\pm 0\%$  SD; FOV  $n = 6$ ; CV = 0%) of cells at two hours. Comparatively, HUVECs, which were  
152 classified as intermediate accumulation of phages showed extensive variability in their uptake  
153 rates, with a median of 12% ( $\pm 41\%$  SD, FOV  $n = 8$ ; CV = 116%) and 46% ( $\pm 35\%$  SD; FOV  
154  $n = 8$ ; CV = 60%) of cells containing phages at one and two hours, respectively.

155  
156 To confirm that phages were internalised and not simply attached to the cell surface, we created  
157 a three-dimensional (3D) reconstruction using a Z stack to visualise the intracellular  
158 localisation of phages. After the live cell imaging of MDCK-I cells incubated with  
159 fluorescently-labelled T4 phages for one hour (Supplemental movie SM8), we acquired a high-  
160 resolution Z stack image of one chosen field of view. We reconstituted the 3D volume of the  
161 cell to visualise phage repartition in the cytoplasm (Fig. 2 top left corner and Supplemental  
162 movie SM9). Finally, we looked at the localization of phages in 3D using the XY cross section  
163 (Fig. 2). The 3D reconstruction of the cell confirmed that phages internalized by the cells  
164 (visualised as green fluorescent particles) lie in the same focal plane as the nucleus (Fig. 2).  
165 Phages were distributed throughout the cell cytoplasm and appeared to be localised within  
166 membrane-bound vesicles surrounding the nucleus.

167

Bichet et al. 2020

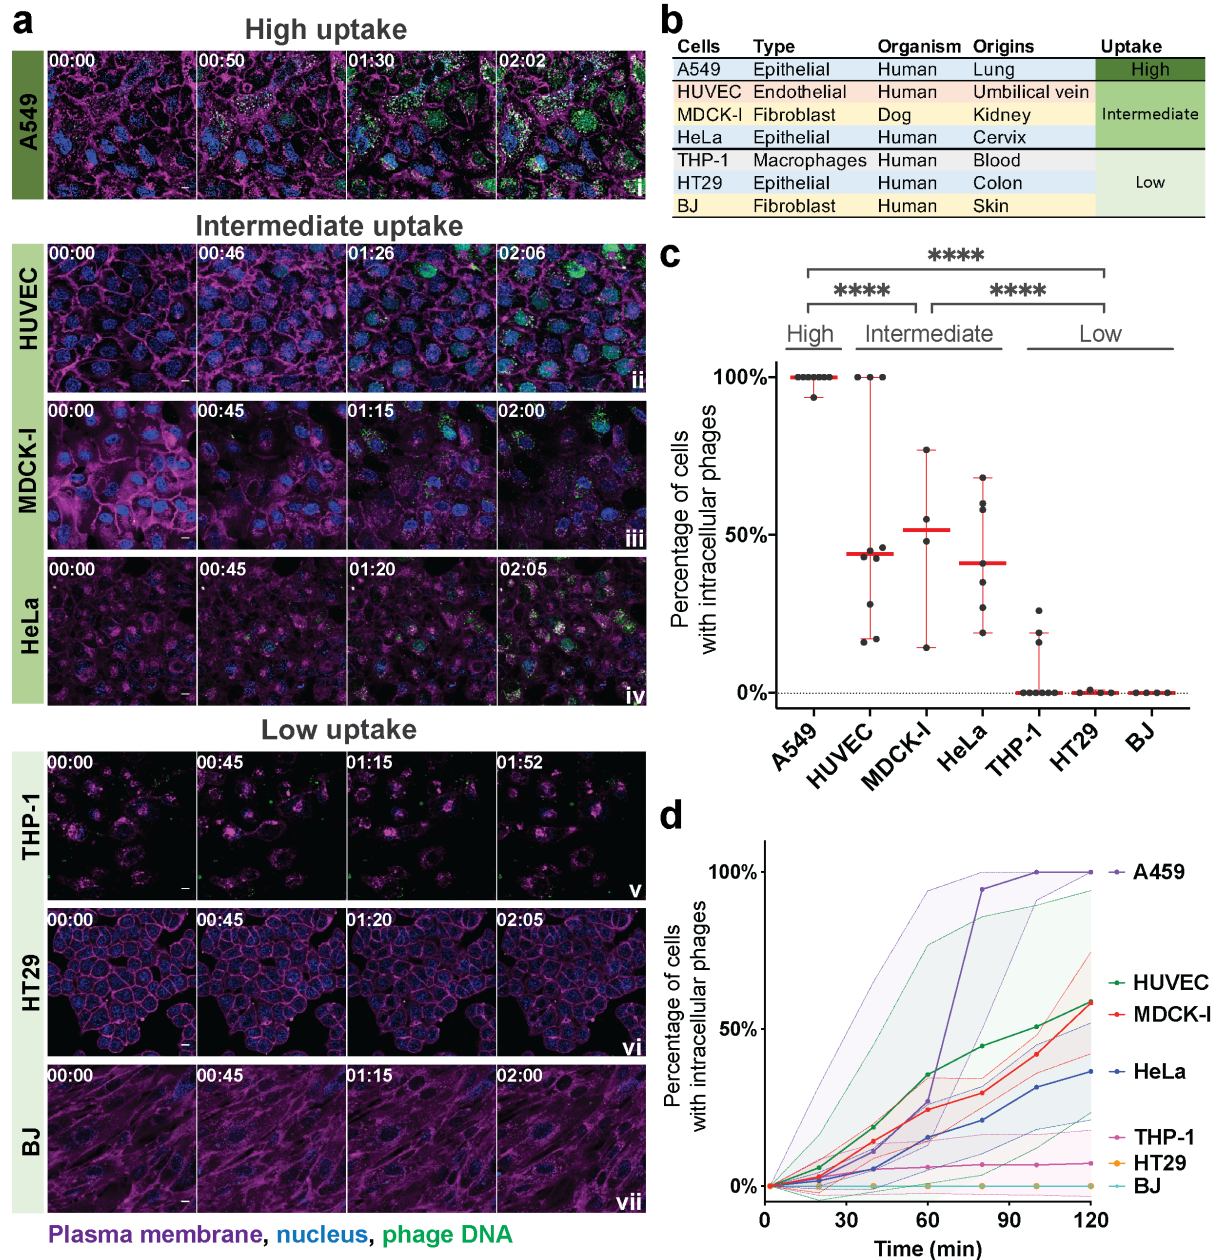

168  
169

170 **Figure 1. Uptake and internalisation of phages varies across cell type.** (a) T4 phage was  
 171 fluorescently labelled, applied to different cell lines and incubated for two hours on a glass  
 172 bottom slide. Cells were stained with Hoechst 33342 nucleus stain (blue), CellMask plasma  
 173 membrane stain (magenta) and T4 phages labelled with SYBR-Gold DNA-complexing stain  
 174 (green). Using real-time microscopy, one image was acquired every two minutes. Scale bar:  
 175 10  $\mu$ m; Timing: hours:minutes. (b) Table of cell lines used in this study, their cell type,  
 176 organism, organ origins and category of uptake. Cells lines are ranked as high, intermediate,  
 177 and low uptake. (c) Percentage of cells containing intracellular phages at the two-hour time  
 178 point. Scatter plots show medians of percentage of cells with intracellular phages; error bars  
 179 represent 95% confidence intervals; each dot represents one Field of View (FOV). Cells lines  
 180 are ranked as high, intermediate and low uptake. P-values between the different groups  
 181 calculated from a one-way ANOVA, shown as stars ( $F(2, 43) = 71.23$ ;  $P < 0.0001$ : \*\*\*\*). (d)  
 182 Percentage of cells containing phages represented across time. For each video the number of  
 183 cells with and without intracellular phages in a FOV were manually counted every ten minutes  
 184 (A549  $n = 6$ ; HUVEC  $n = 8$ ; MDCK-I  $n = 3$ ; HeLa  $n = 6$ ; THP-1  $n = 8$ ; HT29  $n = 3$ ; BJ  $n = 3$ ).



Bichet et al. 2020

185 Curve plots show medians of percentage of cells with intracellular phages; error bars represent  
186 95% confidence intervals in the shaded area for each curve; each point represents one video  
187 over time.  
188

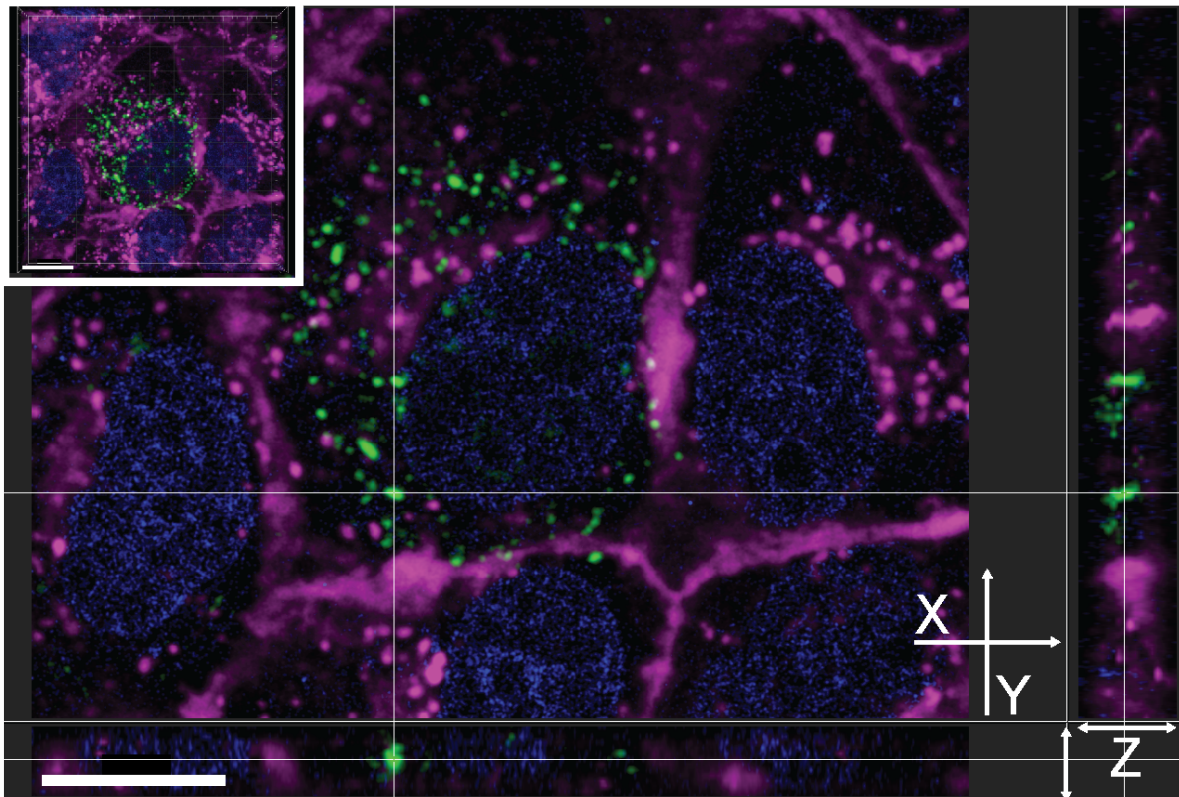

## 189 Plasma membrane, nucleus, phage DNA 190

191 **Figure 2. 3D reconstruction of intracellular phages.** MDCK-I cells were incubated for an  
192 hour with T4 phages on glass bottom slide before acquisition of a high-resolution Z stack to  
193 visualise phage dispersion inside of cells. Cells were stained with Hoechst 33342 nucleus stain  
194 (blue), CellMask plasma membrane stain (magenta) and T4 phages labelled with SYBR-Gold  
195 DNA-complexing stain (green). Images were acquired in real-time on live cells. XY cross  
196 section made using Imaris software with an embedded 3D projection of the cell in the top left  
197 corner of the image. The cross in the centre of the image shows a cluster of internalised phages  
198 with its repartition in the Z dimension (depth) of the image represented in the X and Y sides  
199 views. Scale bar: 10  $\mu\text{m}$ .  
200

Bichet et al. 2020

201 **Phage uptake occurs at comparable rates under both static and flow conditions.** The  
202 previous experiments were all conducted under static conditions, where phages were directly  
203 applied to the cell culture media and phage-cell encounters driven purely by diffusion.  
204 However, in the context of phage therapy, phages administered to the body are likely to  
205 encounter dynamic environments and active fluid flow, such as in the circulatory and lymphatic  
206 system. These dynamic conditions may lead to increased phage-cell encounter rates or altered  
207 cellular uptake (47–52). We investigated whether phage uptake rates under static conditions  
208 were comparable with uptake rates under fluid flow and shear conditions that mimic the  
209 circulatory systems of the body (Fig. 3a). We chose HUVECs to use in our flow experiment  
210 for two main reasons, the first one is that they are part of the intermediate uptake group  
211 determined in our first figure and are not part of one of the two other extremes. Secondly,  
212 HUVECs are endothelial cells and would be amongst the first type of cells to be in contact with  
213 circulating phages in the human body. Using an in-house fabricated microfluidic device  
214 mounted on a glass coverslip adapted for confocal microscopy (53,54), we seeded the device  
215 with HUVECs and incubated it under static conditions for 12 hours to ensure sufficient cellular  
216 attachment to the substrate. Cell layers were allowed to establish within the device under a low  
217 flow rate of 0.66  $\mu\text{l}/\text{min}$  for one day, before increasing to a final flow rate of 8  $\mu\text{l}/\text{min}$  until  
218 cells reached confluency. Physiological shear stress values observed in the human body ranges  
219 from 0.1  $\text{dyne}/\text{cm}^2$  in the microcirculation, reaching higher rates of 50  $\text{dyne}/\text{cm}^2$  found in larger  
220 circulatory vessels (55–59). Due to the volumes of media and quantity of phages applied to the  
221 chip, we chose a flow rate of 8  $\mu\text{l}/\text{min}$ , which is equivalent to a shear stress of 0.1  $\text{dyne}/\text{cm}^2$  in  
222 our chip and was at the lower end of physiological circulatory range (Supplemental Table 1).  
223 We perfused the chips with media containing  $10^9$  phages/ml, with phage uptake visualised as  
224 previously described at two and 18 hours timepoints. Even though the volumes and quantity of  
225 phages seen by the cell layer in the static (200  $\mu\text{l}$ ) and flow (960  $\mu\text{l}$ ) conditions are different,  
226 we still observe similar rates of T4 phage uptake after two hours (Fig. 1a & 3b. ii and  
227 Supplemental Fig. 3). After 18 hours incubation under shear stress, we observed a significant  
228 increase in the fluorescence intensity compared with two hours incubation (unpaired t-test,  $P$   
229  $< 0.001$ ) (Supplemental Fig. 3).

230

Bichet et al. 2020

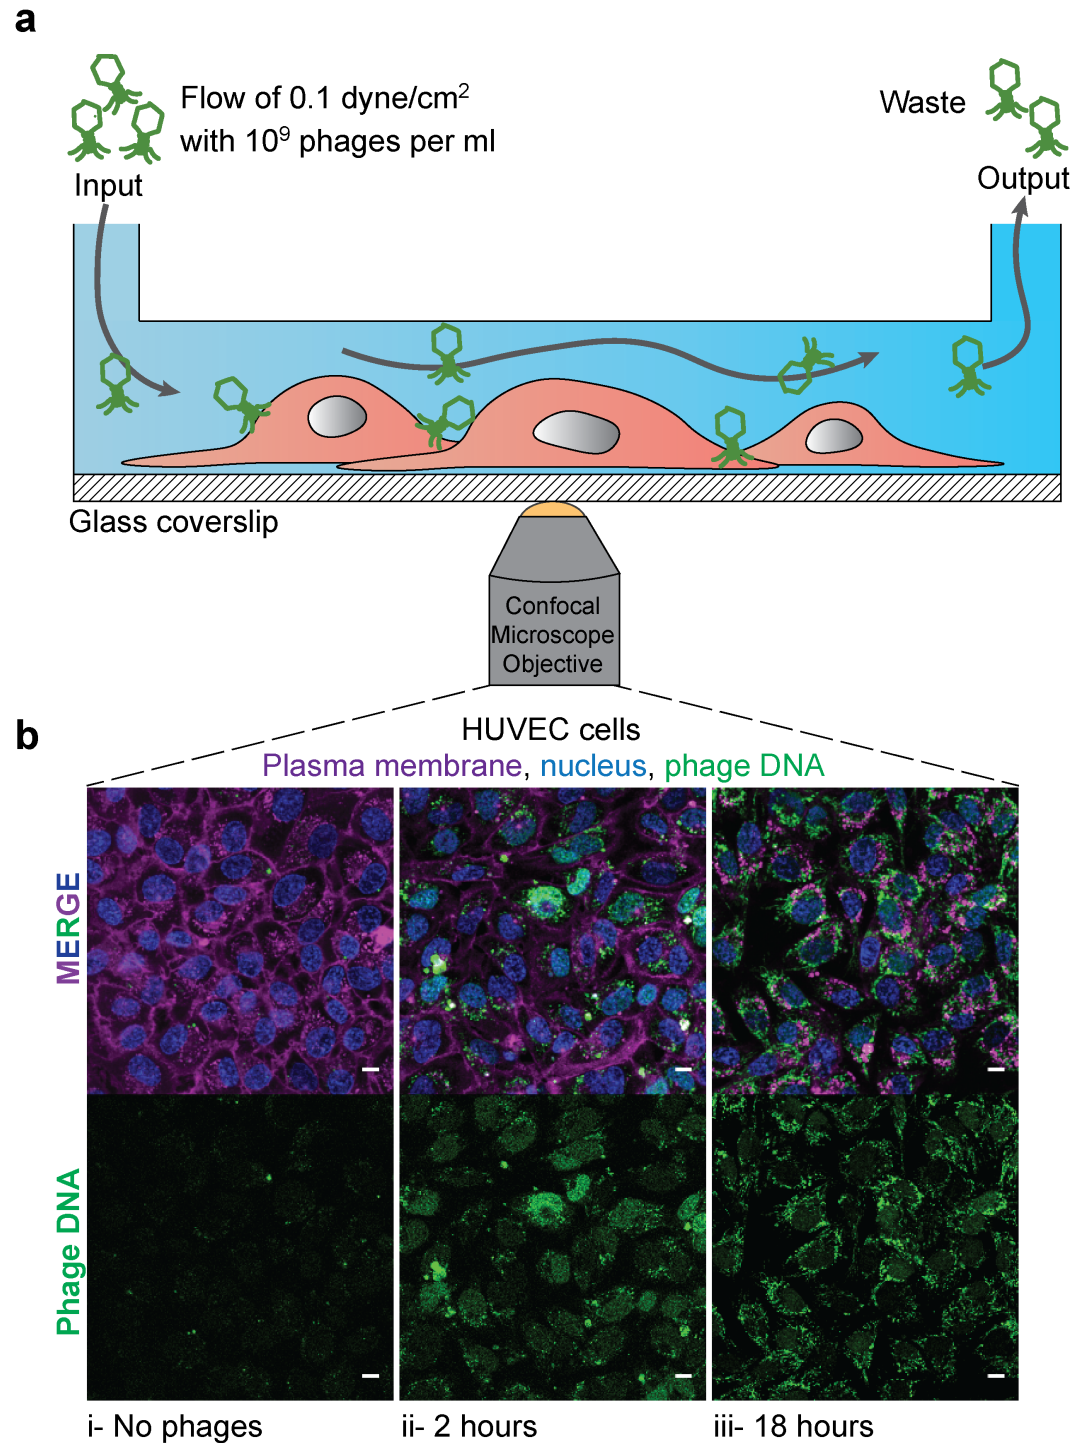

231  
232

233 **Figure 3. Uptake of phages under fluid flow and shear stress.** T4 phage was applied to  
234 HUVECs within a microfluidic channel of a microfluidic device under a shear stress of 0.1  
235 dyne/cm<sup>2</sup> for two or 18 hours with images collected via real-time microscopy images. **(a)**  
236 Schematic of the microchannel showing the flow from one port of the channel to the other side  
237 of the channel where the waste was collected. **(b)** Cells were stained with nucleus stain (blue),  
238 plasma membrane stain (magenta) and T4 phages labelled with DNA-complexing stain (green).  
239 Control cells without phages i). Cells were incubated under a constant flow of phages at a rate  
240 of 8  $\mu$ L/min equivalent to a shear stress of 0.1 dyne/cm<sup>2</sup> for either ii) two or iii) 18 hours. Scale  
241 bar: 10  $\mu$ m.

Bichet et al. 2020

242 **Phage size affects intracellular uptake.** Next, we looked at the effect of phage size on the  
243 rate of cellular uptake. We chose three *Escherichia coli* infecting phages; T4 phage from the  
244 *Myoviridae* family, measuring 90 nm wide and 200 nm long with a contractile tail; Lambda  
245 phage from the *Siphoviridae* family, measuring 60 nm wide and 150 nm long with a non-  
246 contractile tail; and T3 phage from the *Podoviridae* family, measuring 55 nm wide and 30 nm  
247 long with a small non-contractile tail. We tested these phages against three cell lines  
248 representative of high, intermediate, and low rates of uptake (Fig. 1c); A549 cells with a high  
249 rate of uptake, HUVECs with an intermediate rate, and BJ cells with a low rate. We incubated  
250 phages with the cell layers for two hours, acquiring images every two minutes (Supplemental  
251 movies SM1-2, 7, 10-15), with the final time point represented in Fig. 4a. The first row of  
252 images shows clear differences in T4 phage uptake between the three cell lines (Fig. 4a).  
253 However, when we applied the smaller sized Lambda and T3 phages to the three cells lines,  
254 we saw a large increase in the uptake of both phages compared with T4. This was particularly  
255 evident in the BJ cell line, which had effectively no T4 phage uptake over a two-hour period  
256 but nonetheless, demonstrated increased uptake of the smaller sized Lambda and T3 phage.  
257 We quantified phage uptake across phage size and cell type using a pipeline built with  
258 CellProfiler software (60) (see methods) to analyse the median grayvalue intensity in the cell  
259 region (median over all pixels in FOV marked as cells) as a proxy for fluorescence intensity of  
260 phage (Figure 4). For T3 phage, the smallest phage of the three tested, we observed the highest  
261 rate of uptake across the three cell lines (ANOVA one way,  $F(2, 45) = 71,32$ ;  $P < 0.0001$ ).  
262 This was especially evident for the BJ cell line where the median intensity of the phage  
263 fluorescence signal increased from a median of 0.01 normalised grey value with T4 phage ( $\pm$   
264 0.006 SD; FOV  $n = 6$ ; CV = 49%) up to 0.09 with Lambda ( $\pm 0.04$  SD; FOV  $n = 6$ ; CV =  
265 49%), and finally to 0.16 with T3 phage ( $\pm 0.04$  SD; FOV  $n = 3$ ; CV = 22%) (Fig. 4b). Based  
266 on our microscopy results, we suggest that smaller sized phages broadly increase the rate of  
267 cellular uptake, and that these effects were more pronounced in our intermediate and low  
268 uptake cell lines.  
269



Bichet et al. 2020

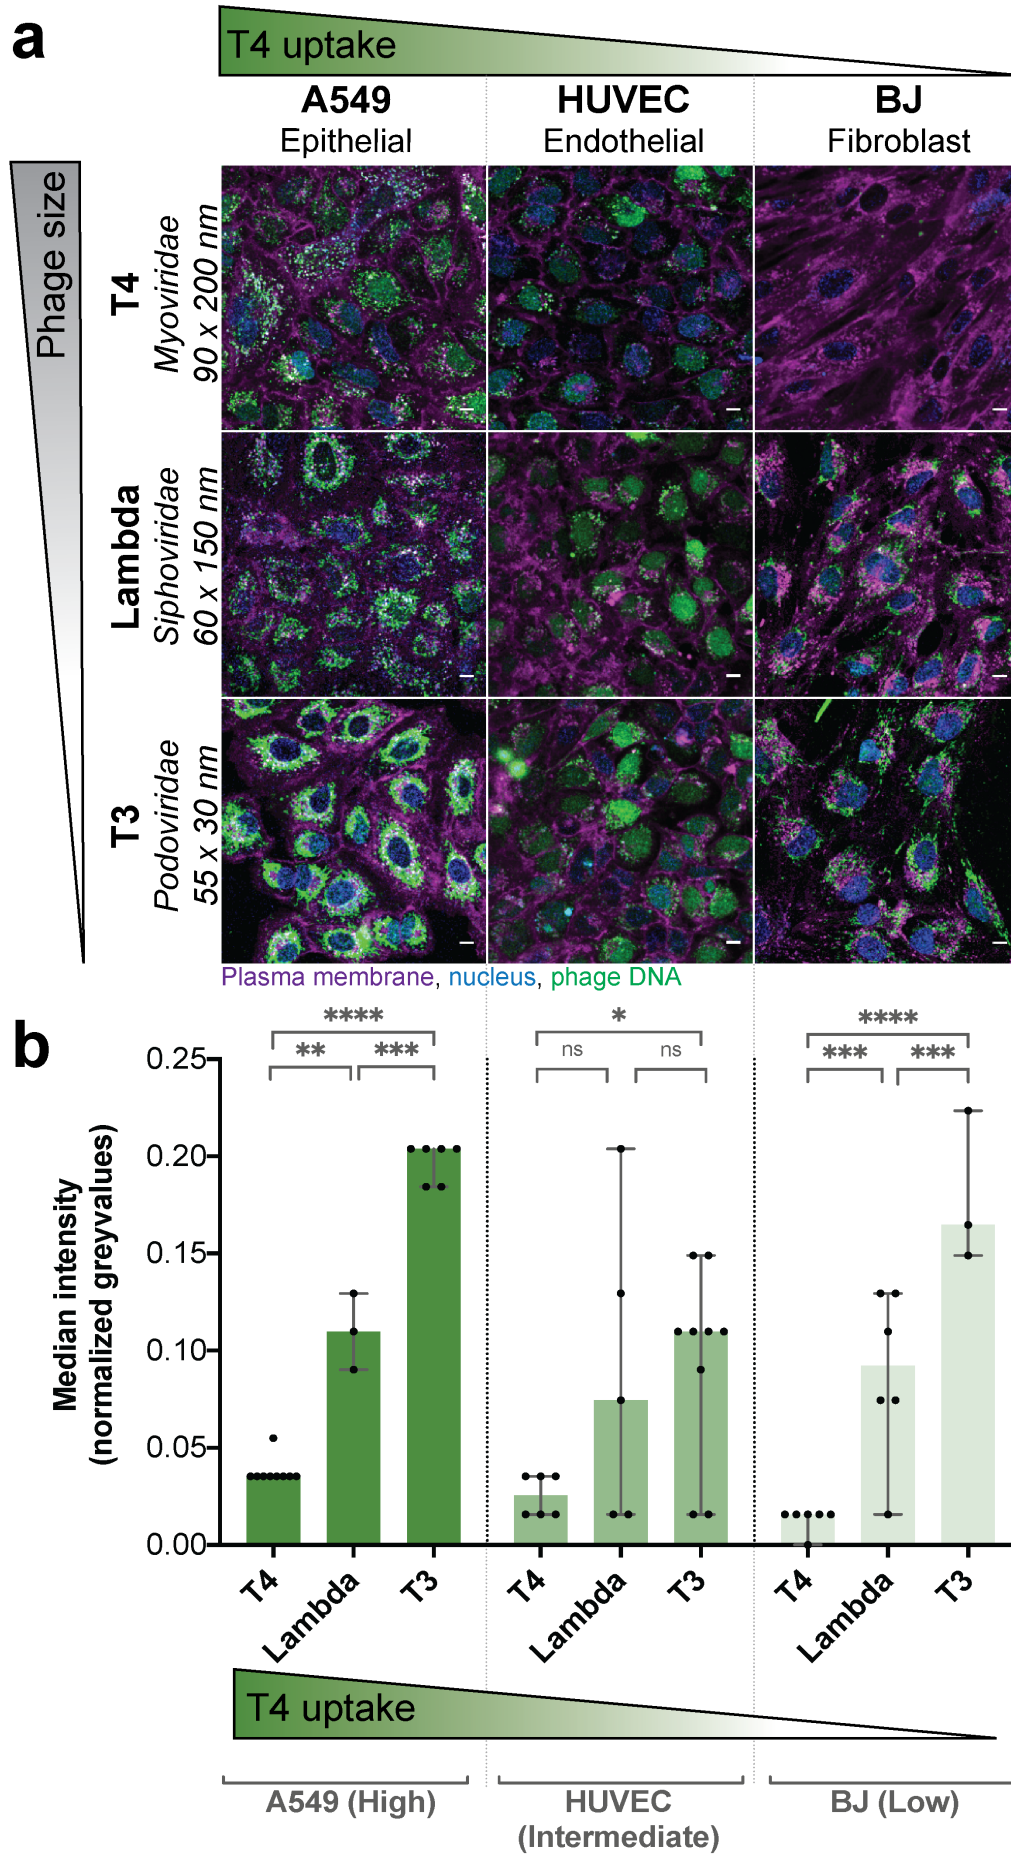



Bichet et al. 2020

271 **Figure 4. Cellular uptake of differing phage particle sizes.** Real-time microscopy images  
272 showing differential uptake of phages based on particle size. One representative cell line from  
273 each of the three high, intermediate, and low uptake groups were picked. **(a)** Images were  
274 acquired in real-time. Cells were stained with Hoechst 33342 nucleus stain (blue), CellMask  
275 plasma membrane stain (magenta) and T4 phages labelled with SYBR-Gold DNA-complexing  
276 stain (green). Three cell lines used; A549, HUVEC and BJ, with the three phages; T4, Lambda,  
277 and T3. Green gradient shows the qualitative increase in T4 phage uptake shown in Figure 1C.  
278 Grey gradient shows qualitative decrease in sizes of phages T4 ( $90 \times 200$  nm), Lambda ( $60 \times$   
279  $150$  nm), and T3 ( $55 \times 30$  nm). Scale bar =  $10 \mu\text{m}$ . The image shown is the last image at two-  
280 hour acquisition. **(b)** Fluorescence intensity of the “phage object” area in normalized grey  
281 values quantified from the CellProfiler software of the phage channel fluorescence at the two-  
282 hour time point (A549 - T4  $n = 9$ ; A549 - Lambda  $n = 3$ ; A549 - T3  $n = 6$ ; HUVEC - T4  $n = 6$ ;  
283 HUVEC - Lambda  $n = 3$ ; HUVEC - T3  $n = 6$ ; BJ - T4  $n = 6$ ; BJ - Lambda  $n = 6$ ; BJ - T3  $n =$   
284  $3$ ). Scatter plots show medians over all pixels in FOV marked as cells; error bars represent 95%  
285 confidence intervals; each point represents one FOV. P-values calculated from a one-way  
286 ANOVA ( $P < 0.0001$ : \*\*\*\*;  $P < 0.05$ : \*; ns: non-significant).  
287

Bichet et al. 2020

288 **Phages rapidly adhere to eukaryotic cells, resulting in inactivation and uptake.** We  
289 demonstrate that phages have different rates of cellular uptake depending on both cell type and  
290 the size of phages. Yet whether these phages remained functional, or if they were inactivated  
291 by the cellular uptake and trafficking pathways remains unclear. To answer this, we quantified  
292 the number intracellular phages using two methods; classic plaque formation unit (PFU) assays  
293 and Droplet Digital PCR (ddPCR). Briefly, PFUs allowed us to quantify the number of active  
294 or functional phages present within the cells, while ddPCR quantified the absolute number of  
295 phage DNA genome copies present in the sample. We evaluated the accuracy of the two  
296 techniques with a dilution series of our initial phage sample from  $10^9$  to  $10^2$  phages per ml  
297 using PFU and ddPCR (Supplemental Fig. 4). Subtracting active phages (PFU) from phage  
298 DNA genome copies (ddPCR) enabled us to quantify the proportion of phages inactivated or  
299 damaged during cellular uptake and trafficking, as these damaged phages are no longer able to  
300 infect their bacterial host and therefore will only be detected by ddPCR.

301

302 In order to differentiate between intracellular phages and those adhered to the cell surface, we  
303 incubated cells with T4 phages ( $\sim 10^9$  per ml) for two different periods of time: 30 seconds,  
304 which is too short for phage internalisation; and 18 hours, to maximise the number of  
305 internalised phages. After incubation at each time point, cells were extensively washed to  
306 remove non-adherent phages, lysed, and phages quantified by both PFU and ddPCR (Fig. 5a).  
307 We compared the same representative cell types previously used for high, intermediate, and  
308 low uptake cell lines (Fig. 5b). For all three cell lines, we saw between 90 and 2200 active  
309 phages (PFU) per ml adhered to the cells within 30 second treatment, with a median of 625  
310 phages/ml ( $\pm 420$  SD;  $n = 6$ ; CV = 60.1%), 325 phages/ml ( $\pm 300$  SD;  $n = 6$ ; CV = 76.6%) and  
311 250 phages/ml ( $\pm 850$  SD;  $n = 6$ ; CV = 114%) for A549, HUVEC and BJ cells, respectively,  
312 suggesting a small, yet persistent number of phages rapidly adhere to the cell layers. After 18  
313 hours of incubation, we saw a large increase in the number of functional phages associated  
314 with the cells, with between  $1.1 \times 10^4$  to  $3.1 \times 10^6$  phages per ml accumulating within the three  
315 cell lines. Looking across the different cell lines, we see the highest accumulation of phages in  
316 the intermediate uptake cells, with a median of  $5 \times 10^5$  phages/ml ( $\pm 6.4 \times 10^5$  SD;  $n = 9$ ; CV  
317 = 85.7%) followed by the high and low uptake with medians respectively of  $1.2 \times 10^5$   
318 phages/ml ( $\pm 8.4 \times 10^4$  SD;  $n = 9$ ; CV = 65.7%) and  $5 \times 10^4$  phages/ml ( $\pm 1.4 \times 10^6$  SD;  $n = 9$ ;  
319 CV = 144.3%), although there were no significant difference between the three cell lines ( $P >$   
320 0.1, ANOVA one way). We note that the BJ cell line, which showed the lowest rate of uptake

Bichet et al. 2020

321 observed via microscopy (Figure 1), still accumulated active phages over prolonged periods of  
322 time with non-significant differences of active phages at 18 hours observed with two other cell  
323 lines (unpaired t-test, two tailed,  $P > 0.08$  with A549 and  $P > 0.6$  with HUVEC).

324

325 Surprisingly, when looking at ddPCR results, we see an increase in phage DNA associated with  
326 the 30 second treatment in all cell lines, with between  $3.9 \times 10^2$  and  $2.7 \times 10^4$  DNA genome  
327 copies per ml persisting. When quantifying the inactivated phages at 30 second treatment,  
328 which was calculated as the difference in DNA genome copies and PFU, we observe between  
329  $7 \times 10^1$  and  $2.7 \times 10^4$  inactivated phages per ml. These results suggest that; 1) phages rapidly  
330 adhere to eukaryotic cell layers, with a portion of these phages being inactivated, 2) longer  
331 incubation time allows for adhered phages to be internalised and accumulate inside of the cells,  
332 and 3) that the majority of internalised phage particles remain active and stably persist within  
333 the cells for up to 18 hours.

334

Bichet et al. 2020

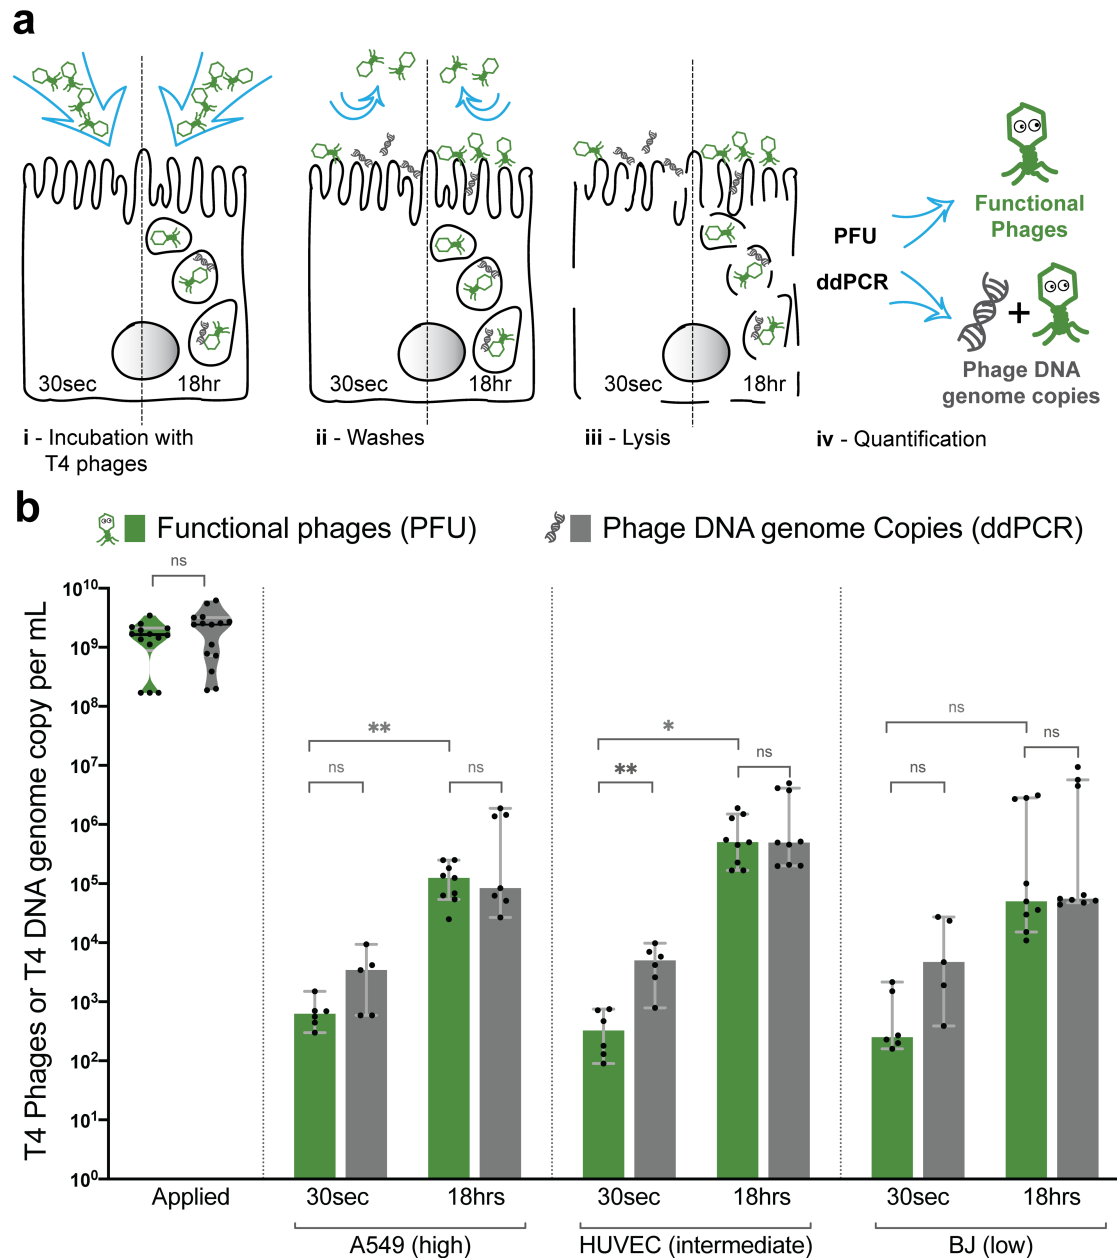

335  
336

337 **Figure 5. Quantifying adherence and internalisation of phages and their activity.** Applied  
338 T4 phages were quantified using both traditional plaque assays (PFUs) and Digital Droplet  
339 PCR (ddPCR), across three different cell-lines: A549, HUVEC and BJ, representative of the  
340 high, intermediate, or low phage uptake. Phages were applied to cells for either 30 seconds as  
341 an adherence control, or for 18 hours to saturate phage uptake. (a) Schematic representation of  
342 the experiment showing steps taken to obtain the samples with two incubation times: 30  
343 seconds or 18 hours. Active or functional phages are represented in green and phage DNA or  
344 inactive phages are represented in grey; (i) Incubation of phages with cells, (ii) Extensive  
345 washing of cells to remove non-adherent phages, (iii) Chemical and mechanical cell lysis, and  
346 (iv) Quantification of the active and total phages via PFU and ddPCR. (b) Active T4 phages in  
347 green quantified by PFU and in grey the total number of T4 phage DNA genome copies per  
348 sample quantified by ddPCR, including both active and inactive phages. Scatter plots show  
349 medians of phages or DNA genome copies per mL; error bars represent 95% confidence  
350 intervals; each point represents one sample. P-values calculated from an unpaired t-test  
351 between each pair (P < 0.001: \*\*\*; P < 0.01: \*\*; P < 0.05: \*; ns: non-significant).

Bichet et al. 2020

352 **Phage inactivation and internalisation influences pharmacokinetics.** A key underexplored  
353 aspect of phage pharmacokinetics (PK) are the non-specific interactions between phages and  
354 the epithelial and endothelial cell layers of the body. To address this, we integrated our  
355 experimental data (Fig. 5) with an established PK model for phage administration in a rats (38).  
356 The model was established from a single-dose PK study performed in healthy rats, following  
357 an intravenous bolus of phages. The phage disposition in blood was well characterised using a  
358 standard three-compartment PK model (38). In order to evaluate the impact of phage  
359 inactivation and internalisation by eukaryotic cells on phage distribution, a fourth-compartment  
360 was added to the existing model, representing the epi- and endothelial cell layers (Fig. 6a).  
361 Deterministic simulations were subsequently performed with the previously estimated PK  
362 parameters (38) and the first-order inactivation constant estimated from our *in vitro* data  
363 (ddPCR). Inactivation rate constant was calculated using both the 30 seconds- and 18 hours-  
364 derived constants, as a representative of both the rapid and prolonged phage accumulation by  
365 cell layers (Fig. 6b, supplemental data SD2, SD3 and table 5). Deterministic simulations were  
366 performed at an IV bolus dose of  $10^9$  phages. With the inactivation rate constant calculated  
367 using 30 second data, complete removal of phages was noted as short as three hours. This is  
368 consistent with the 30 second *in vitro* data, in which rapid inactivation was observed.  
369 Comparatively, using the inactivation rate constant calculated using the 18 hours data, an initial  
370 rapid decay of circulating phages, followed by a longer tail and phage persistence in the blood  
371 was observed for up to 32 hours. These two models represent two extremes of rapid and  
372 prolonged phage accumulation by cell layers, highlighting the potential impact of these cellular  
373 mechanisms on phage disposition. Further studies characterising both the affinity of phage–  
374 eukaryotic interactions and their influence on PK are needed for better clinical translation.  
375

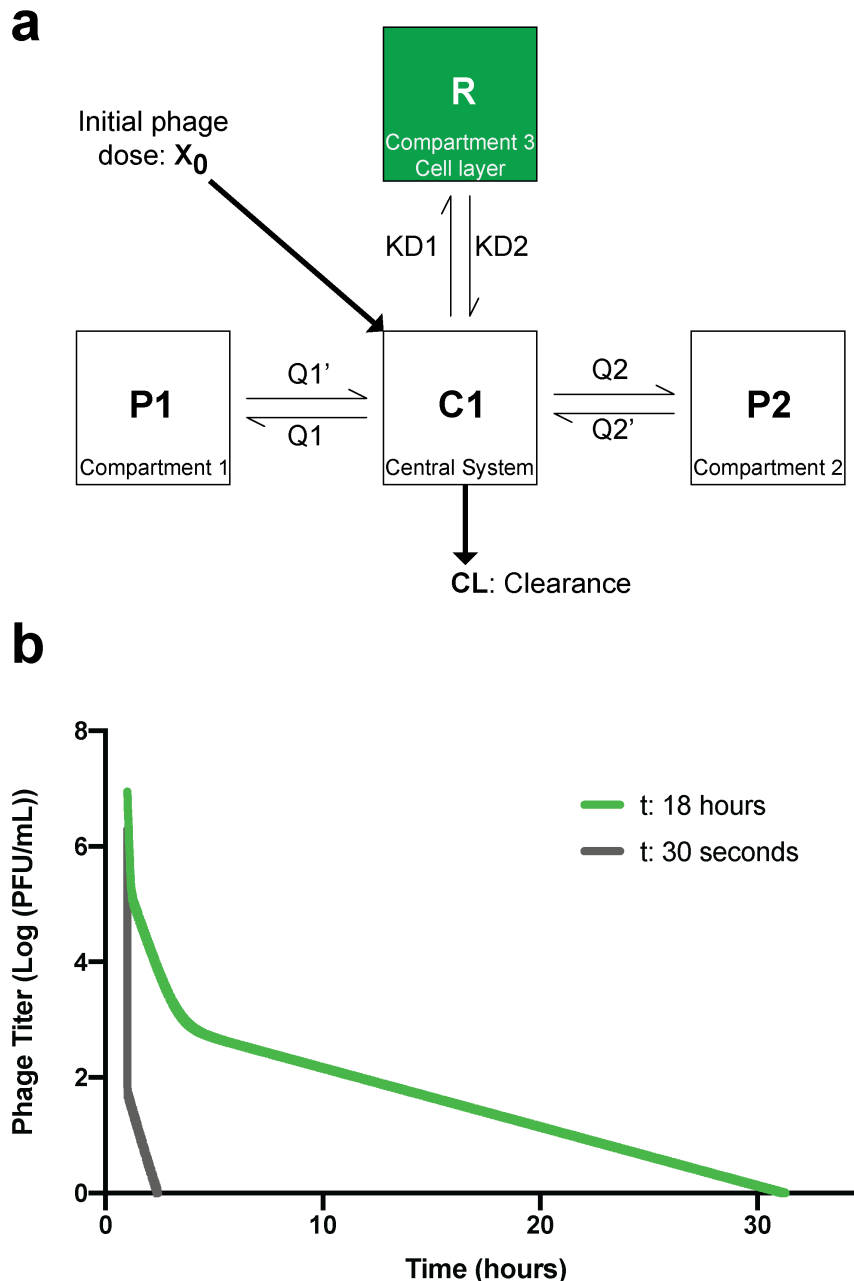

376  
377

378 **Figure 6. Pharmacokinetic (PK) model of inactivation and internalisation of phages by**  
 379 **eukaryotic cell layers.** Extrapolation of *in vitro* results were fit to a rat model of phage decay  
 380 at an initial dose of  $10^9$  phages. **(a)** Schematic of the standard 3-compartments model with an  
 381 additional inactivation compartment.  $X_0$ , the initial dose of phages and CL phage total body  
 382 clearance. C1, the central compartment representing the central system (*i.e.*, the blood). P1 and  
 383 P2 compartments represent various organs or tissues participating in phage decay. R, the new  
 384 compartment representing *in vitro* cell layers as a major sink of phages. Q1 and Q2 are  
 385 intercompartmental clearance one and two, respectively. KD1 is the first order inactivation  
 386 constant and KD2 is the first order reactivation constant (assumed to be zero in our model). **(b)**  
 387 Graph representing the decay of phages per central volume of distribution over time calculated  
 388 with *in vitro* data using an R model with an integration step of 0.001. First order for the 30  
 389 seconds graph is of 1511 1/h/rat and for the 18 hours the first order is of 0.44 1/h/rat calculated  
 390 from the geometric mean of ddPCR data (calculation in supplemental table 5).

## 391 **Discussion**

392 Phage therapy is one of the more promising solutions in the fight against antibiotic resistance  
393 (25). However, the effective use of phages as a treatment against multi-drug resistant bacterial  
394 pathogens remains a major challenge to successfully and reproducibly implement. Our  
395 understanding of the interactions between bacteriophages and eukaryotic cells may have  
396 important implications and impacts for the success of phage therapy. In this article, we  
397 investigate the interactions between phages and *in vitro* tissue culture cell layers. We  
398 demonstrate that cell type plays a major role in the uptake process of phages, with individual  
399 cells taking up phages at different rates, even amongst the same cell types (e.g., epithelial,  
400 endothelial, etc.). Uptake rates were validated under shear stress conditions using a  
401 microfluidic device that mimics the shear stress to which endothelial cells are exposed to *in*  
402 *vivo* (61,62), and shown to be comparable with static conditions. Using live cell imaging we  
403 show that phages accumulate within cells over time and that smaller phages are internalised at  
404 higher rates than larger phages. Phages were found to rapidly adhere to eukaryotic cells, with  
405 adherent phages being internalised by macropinocytosis over the following 18 hours of  
406 incubation, with functional phages accumulating and stably persisting within the cells. Finally,  
407 we incorporate our results into an established pharmacokinetic (PK) model (38), demonstrating  
408 the potential impact of phage accumulation by epithelial and endothelial cell layers, which  
409 represent an unaccounted sink of phages within the body.

410

411 The mechanism of non-specific phage uptake by *in vitro* tissue culture cell lines was previously  
412 demonstrated to occur via macropinocytosis (8). Cell types have been reported to have differing  
413 basal rates of macropinocytosis depending on their function and location within the body (24),  
414 thereby influencing their rate of phage uptake. The macropinosome plays further roles in the  
415 presentation of antigens for pattern recognition receptors located in other organelles, and in the  
416 activation of innate immune responses (63). The fate of phages within the macropinosome is  
417 still unknown. It is clear phages accumulate within the macropinosomes over time, but whether  
418 they are subsequently degraded by the endosomal/lysosomal system, or recycled and fused  
419 back with the plasma membrane remains to be investigated (24). Here we propose that, within  
420 seconds, phages rapidly adhere to the eukaryotic cell membrane. Secondly, this adherence  
421 leads to an internalisation of phages via non-specific macropinocytosis. Thirdly, this allows for  
422 the steady accumulation of phages within the macropinosomes and cell over time. Further  
423 research is required to probe the specific mechanisms of phage adherence, uptake, and the  
424 cellular mechanisms that govern the trafficking of phages within cells (64,65).



Bichet et al. 2020

425

426 Using three different phages, from different families, with different sizes, we were able to show  
427 an effect of phage size on the rate of uptake across three different cell lines. Using real-time  
428 microscopy, we demonstrate that the smaller sized phage particles had increased rates of  
429 uptake, especially in low uptake cell lines. One hypothesis for the increased uptake of smaller  
430 sized phages, may simply be the result of an increased number of particles capable of  
431 interacting with actin-mediated ruffles associated with of macropinosome formation, thereby  
432 leading to a higher number of phages engulfed within each macropinosome (24,66). It is also  
433 possible that there is a difference in ruffle size across cell lines leading to a predisposition of  
434 some cells to uptake smaller or bigger size phages. A similar relationship between particle size  
435 and uptake has been made with nanoparticles, where it was observed that 50 nm size  
436 nanoparticles had high rates of uptake, which coincidentally are of similar size as our T3 phages  
437 (67–69). It was also shown that the cell type, as well as the particles shape influenced uptake,  
438 with disc-shaped particles having higher rates of uptake compared with elongated rod shapes.  
439 Again, our T3 phage are coincidentally similarly shaped to the disc-shaped particles (70,71),  
440 indicating that the shape of phages may play a role in their uptake; a factor that we cannot rule  
441 out from our study. It is intriguing to speculate that much of the research into nanoparticle  
442 delivery has converged upon parameters analogous with biology's own naturally-occurring  
443 nanoparticles; the bacteriophages.

444

445 We observed, that following the rapid adsorption of phages with *in vitro* cell culture layers, a  
446 high proportion of phages were inactivated (Fig. 5b); a phenomenon which has not been  
447 previously reported. Our first hypothesis to explain this rapid inactivation is that upon  
448 interaction with cell surface features, phages are mechanically triggered to eject their genomes,  
449 thereby leading to inactivation (72). This would implicate an increase of phage DNA at the cell  
450 surface, which we observed via ddPCR results, along with a concomitant decrease in functional  
451 phage particles. Another hypothesis is that the transient and non-specific interactions between  
452 the phages and the cell surface features, including glycoproteins, glycolipids, and mucins (73),  
453 may physically block or impede the phage such that it is unable to access its host bacterial  
454 receptor for plaque quantification, thereby only being detected via ddPCR. Finally, this  
455 inactivation could be the result of the degradation of the phage capsid due to enzymes,  
456 secretions, or cellular products. Though our negative controls show this is unlikely, as there  
457 was no effect of spent cell culture media on phage infectivity (Supplemental Fig. 5). At this  
458 stage whilst we cannot conclude the specific mechanisms inducing this rapid loss of phage



Bichet et al. 2020

459 viability, our results clearly suggest that this rapid inactivation and adsorption to the cell layer  
460 may represent a major sink for circulating phages in the body.

461

462 During phage therapy, the cells, organs, and systems of the body play an important role in the  
463 efficacy of treatment due to their effect on the sequestration of active phages and limiting  
464 accessibility to the site of infection (30,31). It has been proposed that the mononuclear  
465 phagocyte system (MPS) is primarily responsible for the filtering and removal of the phages  
466 during phage therapy, with the liver and spleen considered the main organs responsible for  
467 filtering circulating phages (43,74,75). Recent case studies of phage pharmacokinetics (PK)  
468 following intravenous (IV) administration have shown rapid clearance in both humans and  
469 animal models, with over > 99% of phages applied removed from circulation within the first  
470 few hours (38,76). In an extensive literature review, Dabrowska 2019 (30) noted that the phage  
471 titres in the blood immediately following intravenous injection (1-5 minutes) were markedly  
472 less than expected hypothetical dilutions. Even when accounting for phage dilutions in the  
473 blood or total body volume, phage titres only reached between 0.02% and 0.4% of their  
474 predicted titres. This suggests that there is significant and rapid uptake of phages by the organs  
475 and cells of the MPS, or alternatively, the rapid adherence and inactivation of phages to the  
476 epi- and endothelial cells lining the circulatory system. All the cell lines used in this study;  
477 endothelial, epithelial, macrophages or fibroblast, may be in contact with phages at any time  
478 during therapy. Our results demonstrate that phages rapidly adhered to and are subsequently  
479 internalised by these cells (Fig. 5b). The model we developed in this article (Fig. 6), whilst  
480 preliminary, illustrated the potential impact that cell layers play in the inactivation of phages  
481 following their delivery to a patient. We suggest that the cell layers of the body are a major  
482 sink for phages and that these interactions have unrecognised impacts on phage PK and  
483 therapy. If this mechanism is true, then phage most likely display non-linear PK (in addition to  
484 non-linear clearance). These results have unrecognised consequences on phage dosing  
485 regimens during treatment, implying higher doses and more frequent administrations of phages  
486 to patients may be needed in order to reach an optimal phage dose to fight the infection.

487

488 With these new findings on the role of eukaryotic cells in the uptake and inactivation of phages  
489 during phage therapy, we hope to help in the design and engineering of treatment for patients  
490 and to improve the clinical outcome of phage therapy.

491 **Materials and methods**

492 **Bacterial stocks and phage stocks.** The bacterial strains used in this study,  
493 *Escherichia coli* B strain HER 1024 and *E. coli* B strain W3350, were cultured in lysogeny  
494 broth (LB) media (10 g tryptone, 5 g yeast extract, 10 g NaCl, in 1 litre of distilled water  
495 [dH<sub>2</sub>O]) at 37 °C shaking overnight and used to propagate and titre phages T4, T3 and lambda  
496 supplemented with 10 mM CaCl<sub>2</sub> and MgSO<sub>4</sub>. Phages T4, T3 and lambda were cleaned and  
497 purified using the Phage on Tap protocol (PoT) (45) and titred up to a concentration of  
498 approximately 10<sup>10</sup> phages per ml. After purification, phages were stored in a final solution of  
499 SM Buffer (2.0 g MgSO<sub>4</sub>·7H<sub>2</sub>O, 5.8 g NaCl, 50 ml of 1M Tris-HCl pH 7.4, dissolve in 1 litre  
500 of dH<sub>2</sub>O) at 4 °C.

501 **Endotoxin removal.** For each of the phage samples, endotoxin removal protocol was  
502 followed from the Phage on Tap (PoT) protocol (45). Phages lysates were cleaned four times  
503 with octanol to remove endotoxins from the lysate.

504 **Cell line stocks.** Seven cell lines were used in this study, all grown at 37 °C and 5%  
505 CO<sub>2</sub> and supplemented with 1% penicillin-streptomycin (Life Technologies Australia Pty. Ltd)  
506 A549 cells were grown in Ham's F-12K (Kaighn's) (also called F12-K) (Life Technologies  
507 Australia Pty. Ltd) media with 10% Fetal Bovine Serum (FBS) (Life Technologies Australia  
508 Pty. Ltd), HUVECs were grown in F12-K media with 20% FBS, HeLa and HT-29 cells were  
509 both grown in Dulbecco's Modified Eagle Medium (DMEM) (Life Technologies Australia Pty.  
510 Ltd) supplemented with 10% FBS, MDCK-I cells were grown in Modified Eagle Medium  
511 (MEM) (Life Technologies Australia Pty. Ltd) with 10% FBS, BJ cells were grown in DMEM  
512 media with 10% FBS and 1% sodium pyruvate (Sigma-Aldrich, Australia) and finally the  
513 suspension of THP-1 cells were maintained in Roswell Park Memorial Institute (RPMI) 1640  
514 media (Life Technologies Australia Pty. Ltd) with 10% FBS. For differentiation, phorbol 12-  
515 myristate 13-acetate (PMA) (Sigma-Aldrich, Australia) was added to a final concentration of  
516 25 mM and incubated for 48 hours. After incubation PMA supplemented media was removed  
517 and cells were further grown in PMA free media for 24 hours to obtain differentiated  
518 macrophages. These differentiated cells were stable for up to one week.

519 **Confocal microscopy.** For confocal microscopy experiment, cells were seeded in an  
520 IBIDI μ-Slide 8-well glass-bottom slide (DKSH Australia Pty. Ltd) and grown to 80-90%  
521 confluency for acquisition. Cells were treated for 20 min with the respective culture media for  
522 each cell line with 5% Hoechst 33342 stain, excitation/emission 361/497 nm (Life  
523 Technologies Australia Pty. Ltd) and 1% CellMask deep red plasma membrane stain,  
524 excitation/emission 649/666 nm (Life Technologies Australia Pty. Ltd). After incubation cells

Bichet et al. 2020

525 were washed three times with Dulbecco's phosphate-buffered saline (DPBS) 1× and then left  
526 in Hank's Balanced Salt Solution (HBSS) with 1% FBS until acquisition. Purified phages were  
527 labelled with 1% SYBR-Gold, excitation/emission 495/537 nm (Life Technologies Australia  
528 Pty. Ltd) for one hour in the dark at 4 °C, followed by three washes with HBSS in Amicon-  
529 Ultra4 centrifugal unit 100-kDa membrane (Merck Pty. Ltd) to remove excess of stain. The  
530 washed phages were resuspended in a final volume of 1 ml in HBSS media. From a 10<sup>9</sup> phage  
531 per ml solution, we added 200 µl per well to the cells under the microscope right before the  
532 start of the acquisition. Cells were imaged with HC PL APO 63x/1.40 Oil CS2 oil immersion  
533 objective by Leica SP8 confocal microscope on inverted stand with a hybrid detector (HyD) in  
534 real time. Excitation used for Hoechst 33342 (blue), SYBR-Gold and CellMask deep red was  
535 405, 488 and 638 nm; corresponding emission was recorder at 412-462, 508-545 and 648-694  
536 nm detection ranges respectively. HyD detector was used in sequential mode to detect the  
537 phages, it increases the sensitivity of detection by acquiring the same image multiple times and  
538 accumulating the fluorescence signal. All live cell imaging experiments were completed in  
539 triplicate (three fields of view per session). One image was acquired every two minutes for two  
540 hours. Each field of view was hand-picked depending on the cell confluency and success of  
541 staining. Videos were created through post-processing using the FIJI software version 2.0.0-  
542 rc-68/1.52f (77). First, the three channels acquired were merged and processed with a Gaussian  
543 Blur filter of 0.8. Second, each channel brightness and contrast were enhanced for printing  
544 quality. Finally, the time and scale were added to the final movie saved in 12 fps.

545 **Quantification of phages in live cell imaging.** For each live cell experiment, we  
546 quantified cells that contained intracellular green fluorescence as indicative of SYBR-Gold  
547 labelled phages. Live cell images were acquired every ten minutes were quantified by manual  
548 counting the total number of cells in the field of view and the number of cells with intracellular  
549 phages to calculate the percentage of cells containing intracellular phages. Results were plotted  
550 using the GraphPad Prism version 8.4.2 for macOS GraphPad Software, San Diego, California  
551 USA, [www.graphpad.com](http://www.graphpad.com), to show uptake of phages over time.

552 **Clustering analysis.** Univariate clustering was performed using the dynamic  
553 programming algorithm in the R package Ckmeans.1d.dp (46).

554 **Flow conditions in microfluidic chip.** A chip mold with 500 µm wide, 350 µm high  
555 and 1.3 cm long channels was designed using SolidWorks® 2017. The moulds were 3D-printed  
556 using Object Eden360V (Stratasys, USA) with a manufacturer-provided polymer FC720 and  
557 surface-salinized in a vacuum desiccator overnight with 20 µl Trichloro(1*H*,1*H*,2*H*,2*H*-

Bichet et al. 2020

558 perfluorooctyl)silane (Sigma-Aldrich, USA). The microfluidic chips were manufactured via  
559 soft-lithography, by casting a 10:1 mixture of Sylgard 184 PDMS and its curing agent (Dowsil,  
560 USA) respectively, onto the moulds and were cured at 90 °C until completely solidified (~2  
561 hours). The chips were then cut with a surgical knife, gently peeled off, trimmed and their inlet  
562 and outlet were punched with 2 mm biopsy punchers (ProSciTech, Australia). Subsequently,  
563 the chips were washed in pentane and acetone to remove residual uncured PDMS. Atmospheric  
564 plasma generated at 0.65 Torr with high radio frequency was used to bond the PDMS chip to  
565 a glass cover slip No. 1.5H (0.170 mm ± 0.005 mm thickness) optimized for confocal  
566 microscopy (Marienfeld), for 20 seconds. The microchannel of the assembled microfluidic  
567 device were washed with ethanol (80% v/v)-sterilised, UV-sterilised and pre-treated with 1:50  
568 MaxGel™ ECM (Sigma-Aldrich) in cold F12-K media for two hours at 37 °C and 5% CO<sub>2</sub>.  
569 The microchannel was then washed with F12-K media to remove residual ECM. Schematic  
570 and picture of the microdevice is included in supplemental Fig. 2. The channel was seeded with  
571 10 µl of HUVECs at a concentration of 5 × 10<sup>5</sup> cells/ml, which were carefully pipetted through  
572 the in port. The seeded chip was incubated statically for 12 hours to allow cell attachment at  
573 37 °C and 5% CO<sub>2</sub>. This was followed by perfusing the attached cells with complete media for  
574 24 hours at 0.66 µl/min flow rate to establish a confluent cell layer. The cell layer was then  
575 perfused with cell culture media supplemented with 20% of FBS for another 24 hr at 8 µl/min  
576 to acclimate the cells to the shear stress. Perfusion was mediated by a single-channel syringe  
577 pump (New Era Pump Systems, USA) using a 10 ml 21 gauge needled-syringe fitted to Teflon  
578 tubes of 1/16" inner diameter and 1/32" outer diameter (Cole-Palmer, USA) that were  
579 previously sterilised using ethanol (80% v/v)-sterilised, DPBS and UVs. HUVECs were then  
580 stained with nucleus stain, Hoechst 33342 (blue), plasma membrane stain, CellMask (magenta)  
581 under static conditions for 20 min. T4 phages labelled with DNA-complexing stain, SYBR-  
582 Gold (green) were then added to the chip under 8 µl/min flow rate for either two or 18 hours.  
583 After incubation under flow with the phages, the in and out port of the chips were sealed using  
584 sterilized-binder paper clips and the chip placed under the microscope. The images were  
585 acquired with HC PL APO 63x/1.40 Oil CS2 oil immersion objective on an inverted Leica SP8  
586 confocal microscope. A hybrid detector (HyD) was used to visualise phage DNA  
587 (excitation/emission 495/537 nm), other channels were acquired with conventional PMT  
588 detectors for CellMask (excitation/emission 649/666 nm) and for Hoescht 33342  
589 (excitation/emission 361/497 nm).

590           **Image analysis with CellProfiler.** To quantify the fluorescence intensity of SYBR-  
591 Gold labelled phages (495 nm wavelength), we used a pipeline created in CellProfiler (60) (see  
592 the pipeline used in supplemental data, SD1), allowing us to measure the pixel grey values as  
593 a proxy for fluorescence intensity across the image. First, we segmented regions covered by  
594 nuclei by applying the IdentifyPrimaryObjects module to the Hoechst channel image. Second,  
595 we defined expanded regions around the nuclei for cytoplasmic measurements using the  
596 IdentifySecondaryModule with the parameter Distance-N set to 200. Third, we masked out  
597 nuclei regions in the of the nuclei SYBR (phages) channel. This is to exclude fluorescence  
598 coming from the cell nuclei due to the leaking of the SYBR dye from the phage capsid to the  
599 cell nuclei, which would lead to false positive quantification. Finally, the grey values image  
600 intensity in the masked SYBR channel and additional parameters of the secondary objects were  
601 measured (Supplemental data SD1). Only a single time point at two hours at each field of view  
602 was used for the analysis. The number of images analysed for each condition varied, as manual  
603 quality control was applied to exclude out of focus and non-analysable fields of view.

604           **Intracellular phages.** For the intracellular phages experiment, cells were plated in T25  
605 cm<sup>2</sup> flasks until they reached confluency. For the 18 hours experiment, phages were applied in  
606 volumes of 3 ml of media with 10<sup>9</sup> phages/ml per flask and incubated overnight at 37 °C and  
607 5% CO<sub>2</sub>. The control flasks were incubated with 3 ml of phage-free media. After the 18 hours  
608 incubation, control flasks were incubated with the same phage dilution for 30 seconds. The  
609 initial dilution for each flask was collected for quantification. Cells were washed three times  
610 with 5 ml of 1 × DPBS to remove non-adherent phages. Next, one ml of 0.5% trypsin was  
611 added per flask and incubated at 37 °C and 5% CO<sub>2</sub> for a few minutes, once cells detached, the  
612 cells were resuspended in 5 ml of 1 × DPBS and spun at 1500 rpm for three minutes and washed  
613 three times with 5 ml 1 × DPBS to remove any non-adherent phages. After the washes, cells  
614 were resuspended in 1 ml of lysis buffer (0.5 M EDTA and 1 M Tris at pH 7.5, complete with  
615 dH<sub>2</sub>O and adjust pH to 8) and left at room temperature for 20 min. After incubation the cells  
616 are passed through a 30 G syringe three times to ensure complete cell lysis. The lysis was  
617 confirmed by looking at the sample under a microscope.

618           **ddPCR setup.** Digital Droplet Polymerase Chain Reaction (ddPCR) was performed  
619 following manufacturer's instructions (Bio-Rad, Australia). A 20 µl reaction was assembled  
620 with primers, probe, ddPCR Supermix for probe (Bio-Rad, Australia) and sample. The primer  
621 and probe sequence and PCR parameters are shown in supplemental Table 2 - 4. ddPCR  
622 reaction mix was then loaded into eight channel disposable droplet generator cartridge (Bio-

Bichet et al. 2020

623 Rad, Australia). 70 µl of droplet generation oil was added to each channel and placed in the  
624 Bio-Rad QX200 droplet generator. The droplets were transferred into the deep well 96 well  
625 plate (Bio-Rad, Australia), using a multichannel pipette. The plate was then sealed using Bio-  
626 Rad plate sealer and then placed in a conventional thermocycler and the PCR product was  
627 amplified (supplemental Table 4). After amplification, the plate was loaded into the droplet  
628 reader (Bio-Rad, Australia) to quantify the fluorescent droplets. Analysis of the data was  
629 performed using the Poisson distribution with QuantaLife software (Bio-Rad, Australia).

630 **PFU quantification.** The Plaque Forming Unit (PFU) assay was performed using LB  
631 agar plates where a thin layer of soft LB agar was mixed with one ml of host bacterial culture  
632 and the desired dilution of phages was poured on the agar plate. The plate was incubated over-  
633 night at 37 °C before counting the number of plaques formed on the bacterial lawn. The results  
634 were calculated in PFU. To obtain the number of inactive phages we subtracted PFU numbers  
635 (active phages) from the ddPCR numbers (total number of phages).

636 **Pharmacokinetics Model.** A previously developed PK model in healthy rats was  
637 utilized to evaluate the impact of phage inactivation on *in vivo* phage disposition (38). An  
638 additional compartment was incorporated to describe the inactivation and reactivation of  
639 phages by the epi- and endothelial cells. The rates of inactivation and reactivation was  
640 described by first-order rate constant, KD, and was assumed to be constant over time. The  
641 differential equations for phage disposition and inactivation were represented by:

$$642 \frac{dA_1(t)}{dt} = -(CL_T + Q_1 + Q_2) \frac{A_1(t)}{V_1} + Q_1 \frac{A_2(t)}{V_2} + Q_2 \frac{A_3(t)}{V_3} - KD_1 A_1(t) + KD_2 A_4(t)$$

$$643 \frac{dA_2(t)}{dt} = Q_1 \frac{A_1(t)}{V_1} - Q_1 \frac{A_2(t)}{V_2}$$

$$644 \frac{dA_3(t)}{dt} = Q_2 \frac{A_1(t)}{V_1} - Q_2 \frac{A_3(t)}{V_3}$$

$$645 \frac{dA_4(t)}{dt} = KD_1 A_1(t) - KD_2 A_4(t)$$

$$646 CL_T = \frac{V_{max}}{K_m + \frac{A_1}{V_1}}$$

647 where

648  $Q_1$  = inter-compartmental clearance 1 (mL/h/Rat).

649  $Q_2$  = inter-compartmental clearance 2 (mL/h/Rat).

650  $V_1$  = Volume of distribution of the central compartment (mL/Rat).

651  $V_2$  = Volume of distribution of the peripheral compartment 1 (mL/Rat).

652  $V_3$  = Volume of distribution of the peripheral compartment 2 (mL/Rat).



Bichet et al. 2020

653  $k_m$  = Phage titre that produces 50% of the maximal elimination rate of the system (PFU/mL/Rat).

654  $V_{max}$  = Maximum elimination rate (PFU/h/Rat).

655  $KD_1$  = Inactivation rate constant (1/h).

656  $KD_2$  = Reactivation rate constant (1/h).

657 Deterministic was performed using model-predicted median PK parameters in rats without  
658 inter-individual variability and random unexplained variability (Supplementary table 5).

659 Inactivation rate constant was determined using the ddPCR results as described in

660 Supplementary table 5. First order for the 30 seconds graph is of 1415 1/h/rat and for the 18

661 hours the first order is of 0.358 1/h/rat calculated from the ddPCR data. Reactivation rate

662 constant was fixed to 0. Deterministic simulations were performed in R using mrgsolve

663 (version 0.10.4) (38,78).

664

Bichet et al. 2020

665

666 **Authors participation**

667 Conceptualization: MCB, JJB; Methodology: MCB, WHC, WR, AO, LAF, CAH, YWL;  
668 Formal Analysis: MCB, JJB; Investigation: MCB; Resources: JJB; Writing – Original Draft  
669 Preparation: MCB, RP, JJB; Writing – Review and Editing: all authors contributed;  
670 Supervision and Funding Acquisition: JJB

671

672 **Funding**

673 Marion C. Bichet was supported by Monash Graduate Scholarship (MGS). This work,  
674 including the efforts of Jeremy J. Barr, was funded by the Australian Research Council DECRA  
675 Fellowship (DE170100525), National Health and Medical Research Council (NHMRC:  
676 1156588), and the Perpetual Trustees Australia award (2018HIG00007).

677

678 **Acknowledgements**

679 We thank the following labs for kindly providing the cell lines; Hudson Institute of Medical  
680 Research and the Oncogenic Signalling Lab for providing the A549 cell line; the Nucleic Acids  
681 and Innate Immunity Research Group for providing the HT29 and BJ cell lines; the University  
682 of Melbourne and the Obstetrics, Nutrition and Endocrinology Group for providing the  
683 HUVECs; Monash University and the Moseley Laboratory for providing the HeLa cell line.  
684 We thank the following facilities for kindly providing equipment and guidance; Monash Micro  
685 Imaging facility for help with microscopy acquisition, Monash School of Engineering for  
686 providing support in the fabrication of microfluidic devices, and Department of Biochemistry  
687 & Molecular Biology (Monash Biomedicine Discovery Institute) Imaging Facility for  
688 providing access to the ddPCR equipment. This work was performed in part at the Melbourne  
689 Centre for Nanofabrication (MCN) in the Victorian Node of the Australian National  
690 Fabrication Facility (ANFF).

691



692

693 **References:**

694

- 695 1. Rohwer F, Segall AM. In retrospect: A century of phage lessons. *Nature*.  
696 2015;528(7580):46–8.
- 697 2. Hatfull GF. Dark Matter of the Biosphere: the Amazing World of Bacteriophage  
698 Diversity. *J Virol*. 2015 Aug;89(16):8107–10.
- 699 3. Rohwer F. Global phage diversity. *Cell Press*. 2003;113:141.
- 700 4. Clokie MRJ, Millard AD, Letarov A V, Heaphy S. Phages in nature. *Bacteriophage*.  
701 2011;1(1):31–45.
- 702 5. Breitbart M, Hewson I, Felts B, Mahaffy JM, Nulton J, Salamon P, et al. Metagenomic  
703 Analyses of an Uncultured Viral Community from Human Feces. *J Bacteriol*.  
704 2003;185(20):6220–3.
- 705 6. Manrique P, Bolduc B, Walk ST, Van Der Oost J, De Vos WM, Young MJ. Healthy  
706 human gut phageome. *Proc Natl Acad Sci*. 2016;113(37):10400–5.
- 707 7. Shkoporov AN, Hill C. Bacteriophages of the Human Gut: The “Known Unknown” of  
708 the Microbiome. *Cell Host and Microbe*. 2019;Elsevier 25:195–209.
- 709 8. Nguyen S, Baker K, Padman BS, Patwa R, Dunstan RA, Weston TA, et al.  
710 Bacteriophage transcytosis provides a mechanism to cross epithelial cell layers. *MBio*.  
711 2017;8(6).
- 712 9. Sender R, Fuchs S, Milo R. Are We Really Vastly Outnumbered? Revisiting the Ratio  
713 of Bacterial to Host Cells in Humans. *Cell*. 2016; Cell Press;164:337–40.
- 714 10. Barr JJ. A bacteriophages journey through the human body. *Immunol Rev*.  
715 2017;279(1):106–22.
- 716 11. Górski A, Wazna E, Dąbrowska BW, Dąbrowska K, Świtała-Jeleń K, Międzybrodzki  
717 R. Bacteriophage translocation. *FEMS Immunol Med Microbiol*. 2006;46(3):313–9.
- 718 12. Ghose C, Ly M, Schwanemann LK, Shin JH, Atab K, Barr JJ, et al. The Virome of  
719 Cerebrospinal Fluid: Viruses Where We Once Thought There Were None. *Front*  
720 *Microbiol*. 2019 Sep;10.
- 721 13. Międzybrodzki R, Kłak M, Jonczyk-Matysiak E, Bubak B, Wójcik A, Kaszowska M,  
722 et al. Means to facilitate the overcoming of gastric juice barrier by a therapeutic  
723 staphylococcal bacteriophage A5/80. *Front Microbiol*. 2017 Mar;8:1–11.
- 724 14. Geier MR, Trigg ME, Merril CR. Fate of bacteriophage lambda in Non-immune germ-

Bichet et al. 2020

- 725 free mice. *Nature*. 1973;246(5430):221–3.
- 726 15. Huh H, Wong S, St. Jean J, Slavcev R. Bacteriophage interactions with mammalian  
727 tissue: Therapeutic applications. *Adv Drug Deliv Rev*. 2019;145:4–17.
- 728 16. Dabrowska K, Switała-Jelen K, Opolski A, Weber-Dabrowska B, Gorski A. A review:  
729 Bacteriophage penetration in vertebrates. *J Appl Microbiol*. 2005;98(1):7–13.
- 730 17. Dor-On E, Solomon B. Targeting glioblastoma via intranasal administration of Ff  
731 bacteriophages. *Front Microbiol*. 2015;6.
- 732 18. Srivastava AS, Chauhan DP, Carrier E. In utero detection of T7 phage after systemic  
733 administration to pregnant mice. *BioTechniques*. 2004; 37.
- 734 19. Gorski A, Dabrowska K, Switała-Jele K, Nowaczyk M, Weber-Dabrowska B,  
735 Boratynski J, et al. New insights into the possible role of bacteriophages in host  
736 defense and disease. *Med Immunol*. 2003 Feb;2:2.
- 737 20. Karimi M, Mirshekari H, Moosavi Basri SM, Bahrami S, Moghoofei M, Hamblin MR.  
738 Bacteriophages and phage-inspired nanocarriers for targeted delivery of therapeutic  
739 cargos. *Adv Drug Deliv Rev*. 2016;106:45–62.
- 740 21. Handley SA, Thackray LB, Zhao G, Presti R, Miller AD, Droit L, et al. Pathogenic  
741 simian immunodeficiency virus infection is associated with expansion of the enteric  
742 virome. *Cell*. 2012;151(2):253–66.
- 743 22. Lehti TA, Pajunen MI, Skog MS, Finne J. Internalization of a polysialic acid-binding  
744 *Escherichia coli* bacteriophage into eukaryotic neuroblastoma cells. *Nat Commun*.  
745 2017;8(1).
- 746 23. Tao P, Mahalingam M, Marasa BS, Zhang Z, Chopra AK, Rao VB. In vitro and in  
747 vivo delivery of genes and proteins using the bacteriophage T4 DNA packaging  
748 machine. *Proc Natl Acad Sci*. 2013 Apr;110(15):5846–51.
- 749 24. Kerr MC, Teasdale RD. Defining Macropinocytosis. *Traffic*. 2009 Apr;10(4):364–71.
- 750 25. Gordillo Altamirano FL, Barr JJ. Phage Therapy in the Postantibiotic Era. *Clin*  
751 *Microbiol Rev*. 2019;32(2):1–25.
- 752 26. Merril CR, Scholl D, Adhya SL. The prospect for bacteriophage therapy in Western  
753 medicine. *Nat Rev Drug Discov*. 2003 Jun;2(6):489–97.
- 754 27. Kutter E, De Vos D, Gvasalia G, Alavidze Z, Gogokhia L, Kuhl S, et al. Phage  
755 Therapy in Clinical Practice: Treatment of Human Infections. *Curr Pharm Biotechnol*.  
756 2010 Feb;11(1):69–86.
- 757 28. Abedon ST, Kuhl SJ, Blasdel BG, Kutter EM. Phage treatment of human infections.

- 758 Bacteriophage. 2011;1(2):66–85.
- 759 29. Matsuzaki S, Uchiyama J. Phage Pharmacokinetics: Relationship with Administration  
760 Route. In: Phage Therapy: A Practical Approach. Springer International Publishing.  
761 2019;43–57.
- 762 30. Dąbrowska K. Phage therapy: What factors shape phage pharmacokinetics and  
763 bioavailability? Systematic and critical review. 2019;Med Res Rev 39(5):2000–25.
- 764 31. Dąbrowska K, Abedon ST. Pharmacologically Aware Phage Therapy:  
765 Pharmacodynamic and Pharmacokinetic Obstacles to Phage Antibacterial Action in  
766 Animal and Human Bodies. Microbiol Mol Biol Rev. 2019;83(4):1–25.
- 767 32. Payne RJH, Jansen VAA. Understanding bacteriophage therapy as a density-dependent  
768 kinetic process. J Theor Biol. 2001 Jan;208(1):37–48.
- 769 33. Payne RJH, Jansen VAA. Phage therapy: The peculiar kinetics of self-replicating  
770 pharmaceuticals. Clinical Pharmacology and Therapeutics. 2000;68:225–30.
- 771 34. Hoffmann M. Animal Experiments on Mucosal Passage and Absorption Viraemia of  
772 T3 Phages after Oral, Trachéal and Rectal Administration. Zentralblatt fur Bakteriologie  
773 Parasitenkunde, Infekt und Hyg. 1965;198(4):371–90.
- 774 35. Hildebrand GJ, Wolochow H. Translocation of Bacteriophage Across the Intestinal  
775 Wall of the Rat. Exp Biol Med. 1962 Jan;109(1):183–5.
- 776 36. Keller R, Engley FB. Fate of Bacteriophage Particles Introduced into Mice by Various  
777 Routes. Exp Biol Med. 1958 Jul;98(3):577–80.
- 778 37. Sweere JM, Belleghem JD Van, Ishak H, Bach MS, Popescu M, Sunkari V, et al. of  
779 bacterial infection. 2019 Mar;9691.
- 780 38. Lin Y-W, Kyung Chang RY, Rao GG, Jermain B, Han M-L, Zhao J, et al.  
781 Pharmacokinetics/pharmacodynamics of antipseudomonal bacteriophage therapy in  
782 rats: A Proof-of-Concept study. Clin Microbiol Infect. 2020 May.
- 783 39. Doub JB, Ng VY, Johnson AJ, Slomka M, Fackler J, Horne B, et al. Salvage  
784 Bacteriophage Therapy for a Chronic MRSA Prosthetic Joint Infection. Antibiotics.  
785 2020;9:241.
- 786 40. Hodyra-Stefaniak K, Lahutta K, Majewska J, Kaźmierczak Z, Lecion D, Harhala M, et  
787 al. Bacteriophages engineered to display foreign peptides may become short-  
788 circulating phages. Microb Biotechnol. 2019 Jul;12(4):730–41.
- 789 41. Carroll-Portillo A, Lin HC. Bacteriophage and the innate immune system: Access and  
790 signaling. Microorganisms. 2019;7(12):1–11.

Bichet et al. 2020

- 791 42. Van Belleghem JD, Dąbrowska K, Vaneechoutte M, Barr JJ, Bollyky PL. Interactions  
792 between bacteriophage, bacteria, and the mammalian immune system. *Viruses*. 2019  
793 Jan;11(1).
- 794 43. Hodyra-Stefaniak K, Miernikiewicz P, Drapała J, Drab M, Jonczyk-Matysiak E,  
795 Lecion D, et al. Mammalian Host-Versus-Phage immune response determines phage  
796 fate in vivo. *Sci Rep*. 2015 Oct;5(1):1–13.
- 797 44. Sweere JM, Van Belleghem JD, Ishak H, Bach MS, Popescu M, Sunkari V, et al.  
798 Bacteriophage trigger antiviral immunity and prevent clearance of bacterial infection.  
799 *Science*. 2019 Mar;363(6434).
- 800 45. Bonilla N, Rojas MI, Netto Flores Cruz G, Hung S-H, Rohwer F, Barr JJ. Phage on  
801 tap—a quick and efficient protocol for the preparation of bacteriophage laboratory  
802 stocks. *PeerJ*. 2016;4:e2261.
- 803 46. Wang H, Song M. Ckmeans.1d.dp: Optimal k-means clustering in one dimension by  
804 dynamic programming. *R J*. 2011;3(2):29–33.
- 805 47. Kim HJ, Li H, Collins JJ, Ingber DE. Contributions of microbiome and mechanical  
806 deformation to intestinal bacterial overgrowth and inflammation in a human gut-on-a-  
807 chip. *Proc Natl Acad Sci*. 2016;113(1):e7–15.
- 808 48. Kim HJ, Huh D, Hamilton G, Ingber DE. Human Gut-on-a-Chip inhabited by  
809 microbial flora that experiences intestinal peristalsis-like motions and flow. *R Soc*  
810 *Chem*. 2012;12:2165–74.
- 811 49. Navabi N, McGuckin MA, Linden SK. Gastrointestinal Cell Lines Form Polarized  
812 Epithelia with an Adherent Mucus Layer when Cultured in Semi-Wet Interfaces with  
813 Mechanical Stimulation. *PLoS One*. 2013;8(7).
- 814 50. Kim L, Toh YC, Voldman J, Yu H. A practical guide to microfluidic perfusion culture  
815 of adherent mammalian cells. *Lab Chip*. 2007;7(6):681–94.
- 816 51. Thuenauer R, Rodriguez-Boulan E, Rümer W. Microfluidic approaches for epithelial  
817 cell layer culture and characterisation. *Analyst*. 2014;139(13):3206–18.
- 818 52. Son Y. Determination of shear viscosity and shear rate from pressure drop and flow  
819 rate relationship in a rectangular channel. *Polymer (Guildf)*. 2007 Jan;48(2):632–7.
- 820 53. Chin WH, Barr JJ. Phage research in ‘organ-on-chip’ devices. *Microbiol Aust*. 2019  
821 Mar.
- 822 54. Barr JJ, Auro R, Sam-Soon N, Kassegne S, Peters G, Bonilla N, et al. Subdiffusive  
823 motion of bacteriophage in mucosal surfaces increases the frequency of bacterial

- 824 encounters. *Proc Natl Acad Sci.* 2015;112(44):13675–80.
- 825 55. Yum K, Hong SG, Healy KE, Lee LP. Physiologically relevant organs on chips.  
826 *Biotechnol J.* 2014 Jan;9(1):16–27.
- 827 56. Wang C, Lu H, Alexander Schwartz M. A novel in vitro flow system for changing  
828 flow direction on endothelial cells. *J Biomech.* 2012;45(7):1212–8.
- 829 57. Abaci HE, Shen YI, Tan S, Gerecht S. Recapitulating physiological and pathological  
830 shear stress and oxygen to model vasculature in health and disease. *Sci Rep.* 2014  
831 May;4(1):1–9.
- 832 58. Park JY, White JB, Walker N, Kuo CH, Cha W, Meyerhoff ME, et al. Responses of  
833 endothelial cells to extremely slow flows. *Biomicrofluidics.* 2011 Jun;5(2):022211.
- 834 59. Davies PF, Spaan JA, Krams R. Shear stress biology of the endothelium. *Ann Biomed*  
835 *Eng.* 2005 Dec;33:1714–8.
- 836 60. McQuin C, Goodman A, Chernyshev V, Kamensky L, Cimini BA, Karhohs KW, et  
837 al. CellProfiler 3.0: Next-generation image processing for biology. *PLoS Biol.* 2018;
- 838 61. Hosta-Rigau L, Städler B. Shear stress and its effect on the interaction of myoblast  
839 cells with nanosized drug delivery vehicles. *Mol Pharm.* 2013 Jul;10(7):2707–12.
- 840 62. Han J, Zern BJ, Shuvaev V V., Davies PF, Muro S, Muzykantov V. Acute and chronic  
841 shear stress differently regulate endothelial internalization of nanocarriers targeted to  
842 platelet-endothelial cell adhesion molecule-1. *ACS Nano.* 2012 Oct;6(10):8824–36.
- 843 63. Canton J. Macropinocytosis: New Insights Into Its Underappreciated Role in Innate  
844 Immune Cell Surveillance. *Front Immunol.* 2018;9:2286.
- 845 64. Talman L, Agmon E, Peirce SM, Covert MW. Multiscale models of infection. Vol. 11,  
846 *Current Opinion in Biomedical Engineering.* 2019;Elsevier 11:102–8.
- 847 65. Bodner K, Melkonian AL, Barth AIM, Kudo T, Tanouchi Y, Covert MW. Engineered  
848 Fluorescent *E. coli* Lysogens Allow Live-Cell Imaging of Functional Prophage  
849 Induction Triggered inside Macrophages. *Cell Syst.* 2020;10(3):254-264.
- 850 66. Swanson JA, Watts C. Macropinocytosis. *Trends in Cell Biology.* 1995;Elsevier  
851 *Current Trends* 5:424–8.
- 852 67. Lu F, Wu S-H, Hung Y, Mou C-Y. Size Effect on Cell Uptake in Well-Suspended,  
853 Uniform Mesoporous Silica Nanoparticles. *Small.* 2009; 5(12):1408–13.
- 854 68. Yin Win K, Feng SS. Effects of particle size and surface coating on cellular uptake of  
855 polymeric nanoparticles for oral delivery of anticancer drugs. *Biomaterials.* 2005;  
856 26(15):2713–22.

Bichet et al. 2020

- 857 69. Zhu J, Liao L, Zhu L, Zhang P, Guo K, Kong J, et al. Size-dependent cellular uptake  
858 efficiency, mechanism, and cytotoxicity of silica nanoparticles toward HeLa cells.  
859 *Talanta*. 2013;107:408–15.
- 860 70. Agarwal R, Singh V, Journey P, Shi L, Sreenivasan S V., Roy K. Mammalian cells  
861 preferentially internalize hydrogel nanodiscs over nanorods and use shape-specific  
862 uptake mechanisms. *Proc Natl Acad Sci*. 2013 Oct;110(43):17247–52.
- 863 71. Hsiao I-L, Gramatke AM, Joksimovic R, Sokolowski M, Gradzielski M, Haase A. Size  
864 and Cell Type Dependent Uptake of Silica Nanoparticles. *J Nanomed Nanotechnol*.  
865 2014;05(06).
- 866 72. Kellermayer MSZ, Vörös Z, Csík G, Herényi L. Forced phage uncorking: viral DNA  
867 ejection triggered by a mechanically sensitive switch. *Nanoscale*. 2018;10:1898.
- 868 73. Barr JJ, Auro R, Furlan M, Whiteson KL, Erb ML, Pogliano J, et al. Bacteriophage  
869 adhering to mucus provide a non-host-derived immunity. *Proc Natl Acad Sci*.  
870 2013;110(26):10771–6.
- 871 74. Geier MR, Trigg ME, Merrill CR. Fate of bacteriophage lambda in Non-immune germ-  
872 free mice. *Nature*. 1973;246(5430):221–3.
- 873 75. Merrill CR, Biswas B, Carlton R, Jensen NC, Creed GJ, Zullo S, et al. Long-circulating  
874 bacteriophage as antibacterial agents. *Proc Natl Acad Sci*. 1996 Apr;93(8):3188–92.
- 875 76. Schooley RT, Biswas B, Gill JJ, Hernandez-Morales A, Lancaster J, Lessor L, et al.  
876 Development and use of personalized bacteriophage-based therapeutic cocktails to  
877 treat a patient with a disseminated resistant *Acinetobacter baumannii* infection.  
878 *Antimicrob Agents Chemother*. 2017;61(10):1–14.
- 879 77. Schindelin J, Arganda-Carreras I, Frise E, Kaynig V, Longair M, Pietzsch T, et al. Fiji:  
880 an open-source platform for biological-image analysis. *Nat Methods*. 2012;9(7).
- 881 78. Bunn A, Korpela M. A dendrochronology program library in R (dplR).  
882 *Dendrochronologia*. 2018 Jul;26(2):115-24.
- 883
